# Supplementary material for: Impact and Cost-Effectiveness of Alternative Human Papillomavirus Vaccines for Preadolescent Girls in Mozambique: A Modelling Study
Source: MDPI journal article supplement (doi:10.3390/vaccines11061058), 2023-06-02
Supplement: s1 [file s1]

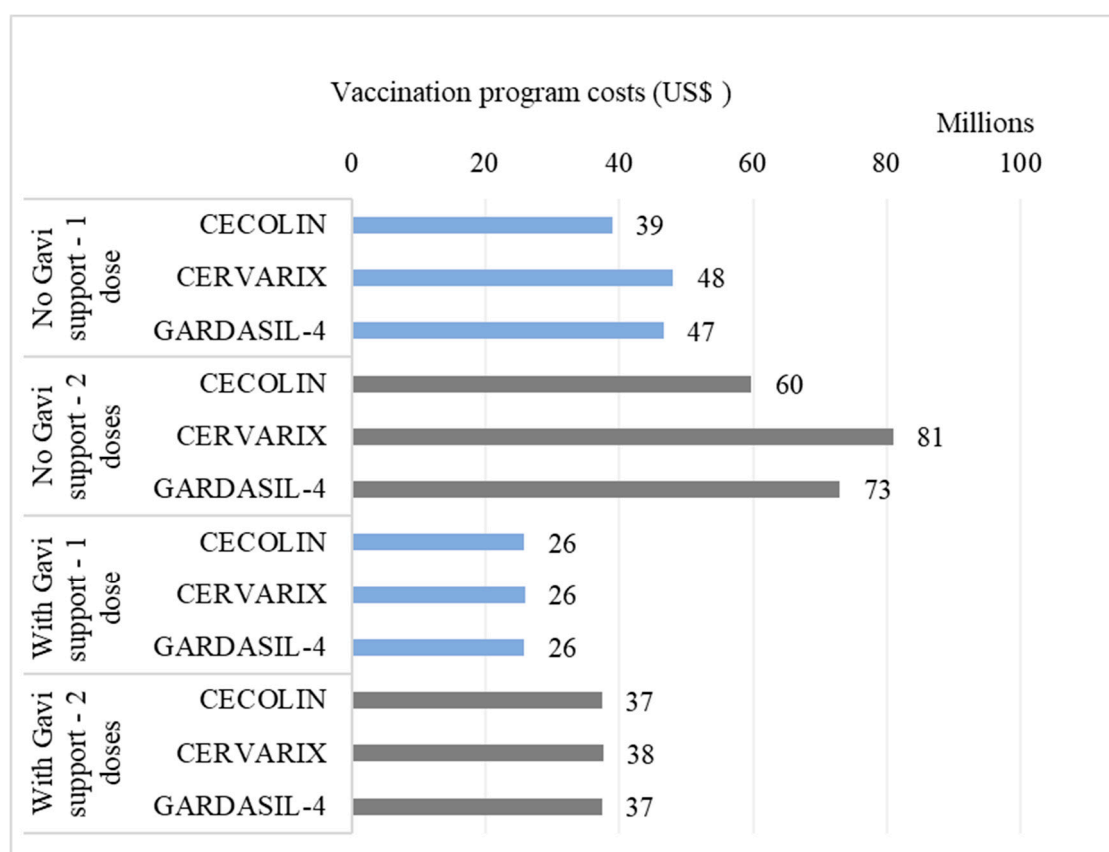

**Figure S1.** HPV vaccination program cost of CECOLIN, CERVARIX and GARDASIL-4, during all the analysis period, 2022 – 2031, including catch-up campaign.

**Table S1.** Deterministic scenarios showing the cost (US\$) per DALY averted of vaccination with Gavi support, using CECOLIN, CERVARIX and GARDASIL-4, compared to no vaccine.

| Vaccine  | Scenario                                                        | Government Perspective |
|----------|-----------------------------------------------------------------|------------------------|
| CECOLIN  | <b>Central inputs (US\$0.20 per dose)</b>                       | <b>1.9</b>             |
|          | Vaccine price = 25% lower (US\$ 2.18 per dose)                  | 20                     |
|          | Vaccine price = 50% lower (US\$ 1.45 per dose)                  | 13                     |
|          | Vaccine price = Highest (US\$ 2.9 per dose)                     | 26                     |
|          | Schedule = 1 dose (efficacy = 2 doses) without cross protection | 0                      |
|          | Schedule = 1 dose (efficacy = 2 doses) with cross protection    | 0                      |
|          | Lower vaccine coverage                                          | 14                     |
|          | Higher vaccine coverage                                         | 26                     |
|          | Discount rate = 10%                                             | 448                    |
|          | Disease burden rates = Low                                      | 14                     |
|          | Disease burden rates = High                                     | 0                      |
|          | Healthcare costs = Low                                          | 10                     |
|          | Healthcare costs = High                                         | 0                      |
|          | No Catch-up campaign                                            | 2                      |
| CERVARIX | <b>Central inputs (US\$0.20 per dose)</b>                       | <b>0</b>               |
|          | Vaccine price = 25% lower (US\$ 1.32 per dose)                  | 1                      |
|          | Vaccine price = 50% lower (US\$ 2.64 per dose)                  | 11                     |
|          | Vaccine price = Highest (US\$ 5.18 per dose)                    | 27                     |
|          | Schedule = 1 dose (efficacy = 2 doses) without cross protection | 0                      |
|          | Schedule = 1 dose (efficacy = 2 doses) with cross protection    | 0                      |
|          | Lower vaccine coverage                                          | 10                     |
|          | Higher vaccine coverage                                         | 13                     |
|          | Discount rate = 10%                                             | 544                    |

|                   |                                                                 |            |
|-------------------|-----------------------------------------------------------------|------------|
|                   | Disease burden rates = Low                                      | 25         |
|                   | Disease burden rates = High                                     | 0          |
|                   | Healthcare costs = Low                                          | 1          |
|                   | Healthcare costs = High                                         | 0          |
|                   | No Catch-up campaign                                            | 18         |
|                   | <b>Central inputs (US\$0.20 per dose)</b>                       | <b>2.8</b> |
|                   | Vaccine price = 25% lower (US\$ 1.13 per dose)                  | 11         |
|                   | Vaccine price = 50% lower (US\$ 2.25 per dose)                  | 21         |
|                   | Vaccine price = Highest (US\$ 4.50 per dose)                    | 42         |
|                   | Schedule = 1 dose (efficacy = 2 doses) without cross protection | 0          |
|                   | Schedule = 1 dose (efficacy = 2 doses) with cross protection    | 0          |
|                   | Lower vaccine coverage                                          | 3          |
|                   | Higher vaccine coverage                                         | 4          |
|                   | Discount rate = 10%                                             | 459        |
|                   | Disease burden rates = Low                                      | 15         |
|                   | Disease burden rates = High                                     | 0          |
|                   | Healthcare costs = Low                                          | 11         |
|                   | Healthcare costs = High                                         | 0          |
|                   | No Catch-up campaign                                            | 3          |
| <b>GARDASIL-4</b> |                                                                 |            |

**Table S2.** Deterministic scenarios showing the cost (US\$) per DALY averted of vaccination without Gavi support, using CECOLIN, CERVARIX and GARDASIL-4, compared to no vaccine.

| Vaccine           | Scenario                                                        | Government Perspective |
|-------------------|-----------------------------------------------------------------|------------------------|
|                   | <b>Central inputs (US\$2.90 per dose)</b>                       | <b>26</b>              |
|                   | Vaccine price = 25% lower (US\$ 2.18 per dose)                  | 20                     |
|                   | Vaccine price = 50% lower (US\$ 1.45 per dose)                  | 13                     |
|                   | Schedule = 1 dose (efficacy = 2 doses) Without Cross Protection | 0                      |
|                   | Schedule = 1 dose (efficacy = 2 doses) with Cross Protection    | 0                      |
|                   | Lower vaccine coverage                                          | 25                     |
|                   | Higher vaccine coverage                                         | 29                     |
|                   | Discount rate = 10%                                             | 729                    |
|                   | Disease burden rates = Low                                      | 44                     |
|                   | Disease burden rates = High                                     | 14                     |
|                   | Healthcare costs = Low                                          | 34                     |
|                   | Healthcare costs = High                                         | 18                     |
|                   | NO Catch-up campaign                                            | 35                     |
| <b>CECOLIN</b>    |                                                                 |                        |
|                   | <b>Central inputs (US\$5.18 per dose)</b>                       | <b>32</b>              |
|                   | Vaccine price = 25% lower (US\$ 1.32 per dose)                  | 1                      |
|                   | Vaccine price = 50% lower (US\$ 2.64 per dose)                  | 11                     |
|                   | Schedule = 1 dose (efficacy = 2 doses) without Cross Protection | 30                     |
|                   | Schedule = 1 dose (efficacy = 2 doses) with Cross Protection    | 13                     |
|                   | Lower vaccine coverage                                          | 27                     |
|                   | Higher vaccine coverage                                         | 32                     |
|                   | Discount rate = 10%                                             | 753                    |
|                   | Disease burden rates = Low                                      | 48                     |
|                   | Disease burden rates = High                                     | 17                     |
|                   | Healthcare costs = Low                                          | 51                     |
|                   | Healthcare costs = High                                         | 35                     |
|                   | NO Catch-up campaign                                            | 43                     |
| <b>CERVARIX</b>   |                                                                 |                        |
|                   | <b>Central inputs (US\$4.50 per dose)</b>                       | <b>42.0</b>            |
|                   | Vaccine price = 25% lower (US\$ 1.13 per dose)                  | 11                     |
|                   | Vaccine price = 50% lower (US\$ 2.25 per dose)                  | 21                     |
|                   | Schedule = 1 dose (efficacy = 2 doses) without Cross Protection | 24                     |
|                   | Schedule = 1 dose (efficacy = 2 doses) with Cross Protection    | 23                     |
|                   | Lower vaccine coverage                                          | 40                     |
|                   | Higher vaccine coverage                                         | 45                     |
|                   | Discount rate = 10%                                             | 915                    |
|                   | Disease burden rates = Low                                      | 64                     |
| <b>GARDASIL-4</b> |                                                                 |                        |

---

|                             |    |
|-----------------------------|----|
| Disease burden rates = High | 28 |
| Healthcare costs = Low      | 50 |
| Healthcare costs = High     | 34 |
| NO Catch-up campaign        | 57 |
